# Supplementary material for: From effective biocontrol agent to successful invader: the harlequin ladybird (Harmonia axyridis) as an example of good ideas that could go wrong
Source: PeerJ. 2017 May 16;5:e3296. doi: 10.7717/peerj.3296 (PMC5436555; doi:10.7717/peerj.3296)
Supplement: Supplemental Information 1 [file peerj-05-3296-s001.xlsx]

## Sheet: Hoja1
First author	Afiliation	Year	collection site	Country	Coordinates	Seen / Collected
Zhaoke Dong	Chinese Academy of Sciences	2012- 2013	Shandong Province	China	116°36′ E, 36°57′ N	Collected
S. Ya Reznik	Russian Academy of Sciences	2010	Irkutsk	Russia	52.3°N, 104.3°E	Collected
S. Ya Reznik	Russian Academy of Sciences	2012	Daegu	South Korea	35.9°N, 128.6°E	Collected
S. Ya Reznik	Russian Academy of Sciences	2010	Pardubice	Czech Republic	50.0°N, 15.8°E	Collected
S. Ya Reznik	Russian Academy of Sciences	2012	Sochi	Russia	43.6°N, 39.6°E	Collected
Yusuke Tsushima	Hiroshima University	2003, 2012-2013	Fukuyama	Japan	34°N, 133°E	Collected
S. Wang	Beijing Academy of Agriculture and Forestry Sciences	2015*	Beijing	China	40° 11' N, 116°30' E	Collected
Annika Beckert	Fraunhofer Institute for Molecular Biology and Applied Ecology	2015*	Giessen	Germany	50°35' N, 8°40' E	Collected
Vera Krischik	University of Minnesota	2007	Rosemount	USA	44°44′ N, 93°07′ W	Collected
Christine A. Bahlai	Michigan State University	1989-2012	Michigan	USA	42°24′N, 85°24′W	Collected
Yoichi Hasegawa	Tohoku University	2005	Tohoku	Japan	38°45′N, 140°45′E	Collected
Bethan V. Purse	NERC Centre for Ecology & Hydrology	2014*	Anglesey, Isle of Wight and the Inner Hebrides	United Kigndom	53° 15' N, 4°25' W	Seen
Luciana Mirande	Centro de Estudios Parasitológicos y de Vectores	2013*	La Plata	Argentina	34.9°S, 57.8°W	Collected
Susanne Kögel	Institute for Plant Protection in Fruit Crops and Viticulture	2009-2010	Siebeldingen	Germany	49°12' N, 8° 03' E	Collected
Eleni Zeki	Benaki Phytopathological Institute	2015*	Benaki	Greece	38°04'N, 23°48' E	Collected
Jiyu Sun	Jilin University	2015*	Changchun city	China	43°49'N, 125°19'E	Collected
Peter Michael James Brown	Anglia Ruskin University	2010	Fordham	United Kigndom	52.3102°N,0.3942°E	Collected
Peter Michael James Brown	Anglia Ruskin University	2010	Wilburton	United Kigndom	52.3537°N,0.1703°E	Collected
Peter Michael James Brown	Anglia Ruskin University	2010	Worlington	United Kigndom	52.3360°N,0.4809°E	Collected
Peter Michael James Brown	Anglia Ruskin University	2010	Reims	France	49.2460°N,4.0219°E	Collected
Peter Michael James Brown	Anglia Ruskin University	2010	Munich	Germany	48.1242°N,11.5291°E	Collected
Peter Michael James Brown	Anglia Ruskin University	2010	Bratislava	Slovakia	48.1826°N,17.1295°E	Collected
Peter Michael James Brown	Anglia Ruskin University	2010	Bratislava	Slovakia	48.1463°N,17.0704°E	Collected
Peter Michael James Brown	Anglia Ruskin University	2010	Jaromerice nad Rokytnov	Czech Republic	49.0941°N,15.8933°E	Collected
Peter Michael James Brown	Anglia Ruskin University	2010	Rosice	Czech Republic	49.1823°N,16.3879°E	Collected
Peter Michael James Brown	Anglia Ruskin University	2010	Trebon	Czech Republic	49.0035°N,14.7641°E	Collected
Kei W. Matsubayashi	Hokkaido University	2014*	Toyoura	Japan	42°35' N, 140° 42' E	Collected
Bérénice Fassotte	University of Liege	2012	Gembloux	Belgium	50°33'N, 4°41' E	Collected
Alexander Machado Auad	Embrapa Dairy Cattle Research Station	2014*	Embrapa Gado de Leite	Brazil	21°46' S, 43°22' W	Collected
A. A. Santos	Federal University of Paraná	2007	Curitiba, Paraná	Brazil	25°25' S, 49°15' W	Collected
Michal Knapp	Czech University of Life Sciences Prague	2011	University of South Bohemia in České Budějovice	Czech Republic	48°26'N, 14°26' E	Collected
William T. Hentley	Centre for Ecology & Hydrology (CEH) Wallingford	2014*	Oxfordshire	United Kigndom	51° 45' N, 1°14' W	Collected
Audrey A. Grez	University of Chile	2010 -2012	Pirque	Chile	33°38′S, 70°33′W	Collected
Audrey A. Grez	University of Chile	2010 -2012	Calera de Tango	Chile	33°37′S; 70°46′W	Collected
Alexander L. Bezzerides	Lewis-Clark State College	2010	Rice Lake	USA	45,48N, 91,74W	Collected
Richard F. Comont	Centre for Ecology and Hydrology	1991-2010	Mainland England, Scotland and Wales	United Kigndom	53°43' N, 2°04' W	Seen
Tobias Gegner	University of Bayreuth	2013	Bayreuth	Germany	49.923944°N, 11.585423°E	Collected
Tobias Gegner	University of Bayreuth	2013	Gereuth	Germany	50.125985°N, 10.818311°E	Collected
Tobias Gegner	University of Bayreuth	2013	Jena	Germany	50.901977°N, 11.571777°E	Collected
Tatiana A. Novgorodova	Siberian Branch of the Russian Academy of Sciences	2012	Novosibirsk	Russia	55°00' N, 82°56' E	Collected
Annie-Ève Gagnon	Centre de recherche sur les grains (CÉROM)	2008	Québec	Canada	46°46' N, 71°16' W	Collected
Sara Maes	Ghent University	2011	Ghent	Belgium	51°03' N, 3°43' E	Collected
F. W. Simon	Simon Fraser University	2013*	Thorold	Canada	43°07'N,79°11' W	Collected
Richard F. Comont	NERC Centre for Ecology & Hydrology	2008-2011	Loughborough	United Kigndom	52°46' N 1°12'W	Collected
Richard F. Comont	NERC Centre for Ecology & Hydrology	2010-2011	Oxfordshire	United Kigndom	51° 45' N, 1°14' W	Collected
Richard F. Comont	NERC Centre for Ecology & Hydrology	2010-2011	London	United Kigndom	51°30' N, 0°07' W	Collected
Richard F. Comont	NERC Centre for Ecology & Hydrology	2011	Cambridge	United Kigndom	52°12' N, 0°07' E	Collected
Richard F. Comont	NERC Centre for Ecology & Hydrology	2011	Plymouth	United Kigndom	50°22' N, 4°08' W	Collected
Hisashi Kuwayama	Nagoya University	2003 -2004	Aichi	Japan	35°10' N, 136°54' E	Collected
Brandon T. Barton	University of Wisconsin	2011	Wisconsin	USA	43°18'N, 89°20' W	Seen
T. Seko	National Agriculture and Food Research Organization Western Region Agricultural Research Center	2010	Fukuyama	Japan	34°28′N, 133°23′E	Collected
Delphine Durieux	University of Liege	2010	Gembloux	Belgium	50°33'N, 4°41' E	Collected
Rebecca H Hallett	University of Guelph	2007-2008	Ontario	Canada	51°14' N, 85° 19' W	Collected
Suzuki Noriyu	Tohoku University	2011	Iwakura	Japan	135°79´E, 35°09´N	Collected
Bin Tang	Beijing Academy of Agriculture and Forestry Sciences	2011	Wangjiayuan village	China	26°23' N, 106°22' E	Collected
Alexandra Průchová	University of South Bohemia	2008-2011	South Bohemia	Czech Republic	48°58'N, 14°28'E	Collected
C. L. Raak-van den Berg	Wageningen University	2006-2010	Various locations	Netherlands	52° 11' N, 5° 18' E	Collected
Eric Lombaert	Sophia Agrobiotech Institute	2010	Brussels	Belgium	50° 51' N, 4°21' E	Collected
Eric Lombaert	Sophia Agrobiotech Institute	2010	Southern and Western France	France	44°38' N,2° 32' E	Collected
Jonathan G. Lundgren	North Central Agricultural Research Laboratory	2011	Cenicaña research station	Colombia	3.34°, −76.31° latitude and longitude	Collected
Guoqiang Xie	Hangzhou Normal University	2014*	Hangzhou Key Laboratory of Animal Adaptation and Evolution	China	30°18'N, 120°23' E	Collected
Ashraf Tayeh	The Center for Biology and Management of Populations	2009	Krasnoyarsk	Russia	56° 00' N, 92°53'E	Collected
Ashraf Tayeh	The Center for Biology and Management of Populations	2009	Fuchu	Japan	35°40'N, 139° 28' E	Collected
Brandon T. Barton	University of Wisconsin	2010	Madison	USA		Seen
Bérénice Fassotte	University of Liege	2012-2014	Gembloux	Belgium	50°33'N, 4°41' E	Collected
L.R.B. Correa	São Paulo State University	2014*	insect ecology laboratory in the Departamento de Fitossanidade	Brazil	21°14' S, 48°17' W	Collected
Julianne Milléo	State University of Ponta Grossa	2012	Fazenda Areão	Brazil	22° 42' S, 47° 30' W	Collected
Ľubomír Panigaj	Pavol Jozef Šafárik University	2008-2012	Various locations	Slovakia	48°40' N, 19°42' E	Seen/Collected
China Morishita	Meijo University	2014*	Laboratory of Sericulture and Entomoresources	Japan	35°09' N, 136° 58' E	Provided
China Morishita	Meijo University	2014*	Laboratory of Environmental Zoology	Japan	35° 08' N, 136° 58' E	Provided
Shize Zhang	Northwest A&F University	2013*	Experimental Farm of the Northwest A&F University	China	34°17′N, 108°01′ E	Collected
Delphine Durieux	University of Liege	2010	Gembloux	Belgium	50°33'N, 4°41' E	Collected
Chelsea A. Smith	The Ohio State University	2009-2010	Ohio	USA	40°29' N, 82° 58' W	Collected
Axel Vandereycken	University of Liege	2099-2011	Wallonia	Belgium	5°24' N, 5°08' E	Collected
Andreas Vilcinskas	Justus-Liebig-University of Giessen	2014*	Beijing	China	39 ° 52' N, 116 ° 24' E	Collected
Andreas Vilcinskas	Justus-Liebig-University of Giessen	2014*	Brussels	Belgium	50° 51' N, 4°21' E	Collected
Andreas Vilcinskas	Justus-Liebig-University of Giessen	2014*	Santiago	Chile	33° 26' S, 70° 40' W	Collected
Andreas Vilcinskas	Justus-Liebig-University of Giessen	2014*	Fuchu	Japan	35°40'N, 139° 28' E	Collected
Andreas Vilcinskas	Justus-Liebig-University of Giessen	2014*	Cuneo	Italy	44°36' N, 7°36' E	Collected
Andreas Vilcinskas	Justus-Liebig-University of Giessen	2014*	Novosibirsk	Russia	55°00' N, 82°56' E	Collected
Andreas Vilcinskas	Justus-Liebig-University of Giessen	2014*	Brookings	USA	38° 54' N, 77° 02' W	Collected
Daniel L. Jeffries	University of Hull	2013*	Harpenden	United Kigndom	51°49' N, 0°21' W	Seen
Christine A. Bahlai	Michigan State University	1989	Michigan State University’s Kellogg Biological Station	USA	42°24’N, 85°24’W	Collected
Camila Fediuk de Castro Guedes	Federal University of Paraná	2008	Curitiba, Paraná	Brazil	25°25' S, 49°15' W	Collected
Luca Sighinolfi	University of Bologna	2002	INRA Antibes	France	43° 36' N, 7° 04' E	Collected
Laís da Conceição dos Santos	São Paulo State University	2009-2011	Laboratory of Insect Ecology of Departamento de Fitossanidade,	Brazil	21°15' S, 48°18' W	Collected
Roman Pavela	Crop Research Institute	2011	Crop Research Institute farm	Czech Republic	50°05' N, 14°18' E	Collected
Chelsea A. Smith	The Ohio State University	2010-2011	Delaware, Ohio	USA	40°18' N, 83° 04' W	Collected
Chelsea A. Smith	The Ohio State University	2010-2011	Fayette, Ohio	USA	41° 40' N, 84° 19' W	Collected
Chelsea A. Smith	The Ohio State University	2010-2011	Huron, Ohio	USA	41° 23' N, 82°33' W	Collected
Chelsea A. Smith	The Ohio State University	2010-2011	Knox, Ohio	USA	40° 27' N, 82°18' W	Collected
Chelsea A. Smith	The Ohio State University	2010-2011	Perry, Ohio	USA	41°45' N, 81°08' W	Collected
Chelsea A. Smith	The Ohio State University	2010-2011	Putnam, Ohio	USA	41°03' N, 84°10' W	Collected
Chelsea A. Smith	The Ohio State University	2010-2011	Shelby, Ohio	USA	40°52' N, 82°39' W	Collected
Chelsea A. Smith	The Ohio State University	2010-2011	Wayne Co, Ohio	USA	40°45' N, 81°57' W	Collected
Guillaume J. M. Laugier	The Center for Biology and Management of Populations	2013*	Beijing	China	39 ° 52' N, 116 ° 24' E	Collected
Guillaume J. M. Laugier	The Center for Biology and Management of Populations	2013*	Fuchu	Japan	35°40'N, 139° 28' E	Collected
Guillaume J. M. Laugier	The Center for Biology and Management of Populations	2013*	Quebec City	Canada	46°46' N, 71°16' W	Collected
Guillaume J. M. Laugier	The Center for Biology and Management of Populations	2013*	Bataszek	Hungary	46°11'N, 18°43' E	Collected
Guillaume J. M. Laugier	The Center for Biology and Management of Populations	2013*	Bethlehem	South Africa	28°14' S, 28°17' E	Collected
Agna R.S. Rodrigues	Federal Rural University of Pernambuco	2009-2012	Jaboticabal	Brazil	21° 14′ S, 48° 19′W	Collected
Agna R.S. Rodrigues	Federal Rural University of Pernambuco	2009-2012	Londrina	Brazil	23° 11′ S, 51° 10′W	Collected
Agna R.S. Rodrigues	Federal Rural University of Pernambuco	2009-2012	Itatinga	Brazil	23° 11′ S, 48° 36′W	Collected
Agna R.S. Rodrigues	Federal Rural University of Pernambuco	2009-2012	Dourados	Brazil	22° 11′ S, 54° 55′W	Collected
Agna R.S. Rodrigues	Federal Rural University of Pernambuco	2009-2012	Viçosa	Brazil	20° 46′ S, 42° 52′W	Collected
Agna R.S. Rodrigues	Federal Rural University of Pernambuco	2009-2012	Brasília	Brazil	15° 45′ S, 47° 52′W	Collected
Débora P. Paula	Embrapa Genetic Resources and Biotechnology	2013	Minnesota	USA	44°57' N, 93°05'W	Collected
Mona Awad	University of South Bohemia	2010	South Bohemia	Czech Republic	48°58'N, 14°28'E	Collected
Michal Knapp	Czech University of Life Sciences Prague	2011	České Budějovice	Czech Republic	48°59′N, 14°27′E	Collected
Wang Su	Beijing Academy of Agriculture and Forestry Sciences	2008	Beijing	China	40° 13'N, 116° 13' E	Collected
C. Shanker	Directorate of Rice Research	2008-2009	Andhra Pradesh	India	7°20′ N, 78°24′ E	Collected
S. Elnagdy	University of Cambridge	2005-2006	Fuchu	Japan	35°40'N, 139° 28' E	Collected
Matthew H. Meisner	University of Wisconsin	2000	Arlington Agricultural Research Station	USA	43°18'N, 89°20' W	Collected
Jiaoliang Xue	Shanxi University	2012	Jishan County, Shanxi Province	China	35°36'N, 110°59' E	Collected
S. Ya. Reznik	Zoological Institute, St. Petersburg, Russia	2012*	Khasanskiy region	Russia	43.1°N, 131.5°E	Collected
Agna R.S. Rodrigues	Federal Rural University of Pernambuco	2013*	Jaboticabal	Brazil	21°14′0.9″ S, 48°19′0.9″ W	Collected
Audrey A. Grez	University of Chile	2011-2012	Pirque	Chile	33°38′S; 70°33′W	Collected
Audrey A. Grez	University of Chile	2011-2012	Calera de Tango	Chile	33°37′S; 70°46′W	Collected
Henrike Schmidtberg	Fraunhofer Institute for Molecular Biology and Applied Ecology	2013*	Giessen	Germany	50°35' N, 8°40' E	Collected
Henrike Schmidtberg	Fraunhofer Institute for Molecular Biology and Applied Ecology	2013*	Ober-Moerlen	Germany	50°22'N, 8°41'E	Collected
Oldřich NEDVĚD	University of South Bohemia	2013*	České Budějovice	Czech Republic	49°00'N, 14°27'E	Collected
Tomokazu Seko	National Agricultural Research Center for Western Region	2003	Fukuyama	Japan	34°28'N, 133°23'E	Collected
Satoshi Nakayama	Okayama University	2013*	Fukuyama	Japan	34°28'N, 133°23'E	Collected
Delphine Durieux	University of Liege	2011-2012	Gembloux	Belgium	50°33'N, 4°41' E	Collected
A. Tayeh	French National Institute for Agricultural Research	2007-2008	Croix	France	50.68°N, 3.14° E	Collected
A. Tayeh	French National Institute for Agricultural Research	2007-2008	Brookings	USA	44.35°N, 96.81°W	Collected
A. Tayeh	French National Institute for Agricultural Research	2007-2008	Bethlehem	South Africa	28.25°N, 28.32°E	Collected
A. Tayeh	French National Institute for Agricultural Research	2007-2008	Abakan	Russia	53.73°N, 91.46°E	Collected
A. Tayeh	French National Institute for Agricultural Research	2007-2008	Novosibirsk	Russia	55.04°N, 82.93°E	Collected
A. Tayeh	French National Institute for Agricultural Research	2007-2008	Kyoto	Japan	35.01°N,135.77°E	Collected
Angelos Katsanis	University of Lausanne	2012*	Various locations	Switzerland	46°50'N, 8°12' E	Collected
Dany S.S.L. Amaral	Federal University of Viçosa	2011	Piranga	Brazil	20° 45′45″ S, 43° 18′10″W	Collected
Andreas Vilcinskas	Justus-Liebig University	2012*	Giessen	Germany	50°35' N, 8°40' E	Collected
Andreas Vilcinskas	Justus-Liebig University	2012*	Ober-Moerlen	Germany	50°22'N, 8°41'E	Collected
Andreas Vilcinskas	Justus-Liebig University	2012*	Jena	Germany	50.901977°N, 11.571777°E	Collected
Satoshi Koyama	Tokyo University of Agriculture and Technology	2005-2006	London	United Kigndom	51°30' N, 0°07' W	Collected
Satoshi Koyama	Tokyo University of Agriculture and Technology	2005-2006	Fuchu	Japan	35°40'N, 139° 28' E	Collected
Brecht Ingels	Ghent University	2009-2011	Ghent	Belgium	51° 03' N, 3°42' E	Collected
C. Lidwien Raak-van den Berg	Wageningen University	2010-2011	Alkmaar	Netherlands	52°37´57˝N 4°44´35˝E	Collected
C. Lidwien Raak-van den Berg	Wageningen University	2010-2011	Alphen a/d Rijn	Netherlands	52°7´27˝N 4°40´2˝E	Collected
C. Lidwien Raak-van den Berg	Wageningen University	2010-2011	Deelen	Netherlands	52°3´53˝N 5°53´23˝E	Collected
C. Lidwien Raak-van den Berg	Wageningen University	2010-2011	Doesburg	Netherlands	52°0´57˝N 6°8´9˝E	Collected
C. Lidwien Raak-van den Berg	Wageningen University	2010-2011	Kootwijk	Netherlands	52°10´39˝N 5°45´39˝E	Collected
C. Lidwien Raak-van den Berg	Wageningen University	2010-2011	Tilburg	Netherlands	51°33´22˝N 5°4´7˝E	Collected
C. Lidwien Raak-van den Berg	Wageningen University	2010-2011	Wageningen	Netherlands	51°58´53˝N 5°40´20˝E	Collected
C. Lidwien Raak-van den Berg	Wageningen University	2010-2011	Winssen	Netherlands	51°53´11˝N 5°41´22˝E	Collected
C. Lidwien Raak-van den Berg	Wageningen University	2010-2011	Winterswijk	Netherlands	51°55´17˝N 6°43´8˝E	Collected
Christine A. Nalepa	North Carolina Department of Agriculture & Consumer Services	2004-2005	North Carolina	USA	35.79°N, 78.73°W	Collected
Christine A. Nalepa	North Carolina Department of Agriculture & Consumer Services	2007-2008	North Carolina	USA	35.79°N, 78.73°W	Collected
Natalia A. Belyakova	Russian Academy of Agricultural Sciences	2012	Sochi	Russia	43.1°N, 131.5°E	Collected
Axel Vandereycken	University of Liege	2009-2011	Hesbaye	Belgium	50°36'N,5°06'E	Collected
Susanne Kögel	Institute for Plant Protection in Fruit Crops and Viticulture	2010-2011	Siebeldingen	Germany	49°12' N, 8° 03' E	Collected
Alison P. Thomas	Anglia Ruskin University	2008-2010	East Anglia	United Kigndom	52°37'N, 1°14'E	Collected
Alison P. Thomas	Anglia Ruskin University	2008-2010	St Ives	United Kigndom	50°12'N, 5°29'W	Collected
Alison P. Thomas	Anglia Ruskin University	2008-2010	Fordham	United Kigndom	52°18'N,0°23'E	Collected
Alison P. Thomas	Anglia Ruskin University	2008-2010	Worlington	United Kigndom	52°20' N, 0°28' E	Collected
Alison P. Thomas	Anglia Ruskin University	2008-2010	Wilburton	United Kigndom	52°21'N, 0°10'E	Collected
Tatiana A. Novgorodova	Siberian Branch of the Russian Academy of Sciences	2007-2010	Altai Republic	Russia	51°48´N, 87°17´E	Collected
Tatiana A. Novgorodova	Siberian Branch of the Russian Academy of Sciences	2003-2005	Novosibirsk	Russia	54°57´N, 83°06´E	Collected
Tatiana A. Novgorodova	Siberian Branch of the Russian Academy of Sciences	2007-2009	Karasuk	Russia	53°44´N, 78°02´E	Collected
Tatiana A. Novgorodova	Siberian Branch of the Russian Academy of Sciences	2007-2008	Kurgan	Russia	55°27´N, 65°20´E	Collected
Sergey Ya. Reznik	Russian Academy of Sciences	2004	Kedrovaya Pad'	Russia	43°05′N, 131°30′E	Collected
Guillermo González F		2012	Loja	Ecuador	3°58'S, 79°12' W	Collected
Jian Liu	Northeast Agricultural University	2004-2005	Heilongjiang Province	China	45.4°N, 126.4°E	Collected
James D. Dutcher	, University of Georgia	2010-2011	Georgia	USA	31° 30' N, 83° 38' W	Collected
A. J. Varenhorst	Iowa State University	2009-2010	Iowa State University's Johnson Research Farm in Story County	USA	42°01'N, 93°46' W	Seen
Tsunashi Kamo	National Institute for Agro-Environmental Sciences	2012	Tsukuba	Japan	36°05'N.140°04'E	Collected
Mizuko Osanai-Futahashi	Nagoya University	2012*	Agrisect Inc.	Japan	35°57' N, 140° 17' E	Collected
Myung-Jin Moon	Dankook University	2012*	Cheonan campus of Dankook University	South Korea	37° 19' N, 127° 07' E	Collected
C. Lidwien Raak-van den Berg	Wageningen University	2009-2010	Alkmaar	Netherlands	52° 37' N, 4° 44'E	Collected
C. Lidwien Raak-van den Berg	Wageningen University	2009-2010	Houten	Netherlands	52° 1' N, 5°9' E	Collected
C. Lidwien Raak-van den Berg	Wageningen University	2009-2010	Loenen	Netherlands	52° 6' N, 6° 0' E	Collected
C. Lidwien Raak-van den Berg	Wageningen University	2009-2010	Kootwijk	Netherlands	52° 10' N, 5° 45' E	Collected
C. Lidwien Raak-van den Berg	Wageningen University	2009-2010	Zundert	Netherlands	51° 30' N, 4°38' E	Collected
JM. Schuber	Federal University of Paraná	2005-2006	Araucária	Brazil	25° 35' S, 49° 24' W	Collected
Erik J. Glemser	University of Guelph	2008	ornamental plants around the University of Guelph	Canada	43° 32' N, 80° 13' W	Collected
Y. Xue	Texas A&M University System	2012*	Ontario	Canada	51°14' N, 85° 19' W	Collected
George O Poinar	Oregon State University	2010	Copenhagen	Denmark	55° 40' N, 12° 34' E	Collected
Carla C. Dutra	Federal University of Grande Dourados	2012*	University of Minnesota	USA	44° 58' N, 93° 11' W	Collected
Suzuki Noriyuki	Kyoto University	2009	Kyoto	Japan	35°09′N, 135°79′E	Collected
Suzuki Noriyuki	Kyoto University	2011	Kyoto	Japan	35°09′N, 135°79′E	Collected
Natalia A. Belyakova	Russian Academy of Agricultural Sciences	2009-2010	Irkutsk Province	Russia	56°14' N, 103°40' E	Collected
Erin J. Stephens	Cornell University	2004	New York	USA	40°44' N, 74°02' W	Collected
Pascal D. Leroy	Departments of Functional and Evolutionary Entomology	2009	Gembloux	Belgium	50°33'N, 4°41' E	Collected
C. Lidwien Raak-van den Berg	Wageningen University	2009	Kootwijk	Netherlands	51° 59' N, 5° 39' E	Collected
C. Lidwien Raak-van den Berg	Wageningen University	2009	Houten	Netherlands	52° 1' N , 5° 9' E	Collected
Gabriele Rondoni	University of Perugia	2007	Turin	Italy	45° 04' N, 7° 41' E	Collected
Susanne Kögel	Institute for Plant Protection in Fruit Crops and Viticulture	2011	Dossenheim	Germany	47° 51' N, 12° 07'E	Collected
Susanne Kögel	Institute for Plant Protection in Fruit Crops and Viticulture	2011	Siebeldingen	Germany	49° 12' N, 8° 03' E	Collected
Ashraf Tayeh	French National Institute for Agricultural Research	2009	Beijing	China	40° 13'N, 116° 13' E	Collected
Ashraf Tayeh	French National Institute for Agricultural Research	2009	Fuchu	Japan	35°40'N, 139° 28' E	Collected
Ashraf Tayeh	French National Institute for Agricultural Research	2008-2009	Quebec City	Canada	46°46' N, 71°16' W	Collected
Ashraf Tayeh	French National Institute for Agricultural Research	2008-2009	Bataszek	Hungary	46° 11' N, 18° 43' E	Collected
Ashraf Tayeh	French National Institute for Agricultural Research	2007	Biotop company, Valbonne	France	43°38' N, 7° 02' E	Collected
Suzuki Noriyuki	Kyoto University	2008	Botanical Garden of Kyoto University	Japan	35°02′N, 135°47′E	Collected
Sandra Krengel	Julius Kü hn-Institut	2009	Kleinmachnow	Germany	52° 24' N, 13°12' E	Collected
Delphine Durieux	University of Liege	2009-2010	Gembloux	Germany	50°33'N, 4°41' E	Collected
Pascal D. Leroy	University of Liege,	2009	Gembloux	Germany	50°33'N, 4°41' E	Collected
Dany S.S.L. Amaral	Federal University of Vicosa	2012	University of Kentucky Horticulture Research Farm	USA	37°58′ N, 84°32′ W	Collected
Annabelle Firlej	University of Montreal	2012*	southwestern Quebec	Canada	45° 21' N, 73° 09' W	Collected
Susanne Kögel	Institute for Plant Protection in Fruit Crops and Viticulture	2009	Dossenheim	Germany	47° 51' N, 12° 07'E	Collected
C. Lidwien Raak-van den Berg	Wageningen University	2008-2009	Deelen	Netherlands	52° 3' N, 5° 53' E	Collected
C. Lidwien Raak-van den Berg	Wageningen University	2008-2009	Kop van Deelen	Netherlands	52° 3' 37'' N, 5° 53' 54'' E	Collected
C. Lidwien Raak-van den Berg	Wageningen University	2008-2009	Posbank	Netherlands	52° 1° N, 6° 1' E	Collected
C. Lidwien Raak-van den Berg	Wageningen University	2008-2009	Alphen a/d Rijn	Netherlands	52° 7' N, 4° 40 ' E	Collected
C. Lidwien Raak-van den Berg	Wageningen University	2008-2009	Kootwijk	Netherlands	52° 10' N, 5° 45' E	Collected
C. Lidwien Raak-van den Berg	Wageningen University	2008-2009	Loenen, Ter Horst	Netherlands	52° 7° N, 6° 1' E	Collected
C. Lidwien Raak-van den Berg	Wageningen University	2008-2009	Loenen, Steinhull	Netherlands	52° 6' N, 6° 0' E	Collected
C. Lidwien Raak-van den Berg	Wageningen University	2008-2009	Lunteren	Netherlands	52° 5' N, 5° 37' E	Collected
C. Lidwien Raak-van den Berg	Wageningen University	2008-2009	Experimental farm	Netherlands	51° 59' N, 5° 39' E	Collected
Tomokazu Seko	National Agriculture and Food Research Organization Western Region Agricultural Research Center	2003	Fukuyama	Japan	34° 28' N, 133° 23' E	Collected
Chang-Chun Ruan	Jilin Agricultural University	2009	Jilin Agricultural University	China	43° 48' N, 125° 23' E	Collected
M. J. Orchard	The University of Hull	2011*	Kingston upon Hull	United Kigndom	53°45′ N, 0°21′ W	Collected
Bruno Frechette	University of Montreal	2012*	southwestern Quebec	Canada	45° 21' N, 73° 09' W	Collected
Gabriele Rondoni	University of Perugia	2007	Turin	Italy	45° 04' N, 7° 41' E	Collected
Érica Sevilha Harterreiten-Souza	University of Brasilia	2008	Gama	Brazil	15° 56' S, 48° 08' W	Collected
Susanne Kögel	Institute for Plant Protection in Fruit Crops and Viticulture	2009	Julius Kü hn-Institut	Germany	49° 12' N, 8° 03' E	Collected
Mark A. Genung	University of Tennessee	2006	Oak Ridge	USA	36°01' N, 84° 13' O	Seen
C. Lidwien Raak-van den Berg	Wageningen University	2009	Alkmaar	Netherlands	52° 37' N, 4° 44' E	Collected
C. Lidwien Raak-van den Berg	Wageningen University	2009	Houten	Netherlands	52° 1' N, 5°9' E	Collected
C. Lidwien Raak-van den Berg	Wageningen University	2009	Loenen	Netherlands	52° 6' N, 6° 0' E	Collected
C. Lidwien Raak-van den Berg	Wageningen University	2009	Kootwijk	Netherlands	52° 10' N, 5° 45' E	Collected
C. Lidwien Raak-van den Berg	Wageningen University	2009	Zundert	Netherlands	51° 30' N, 4°38' E	Collected
C. Lidwien Raak-van den Berg	Wageningen University	2009	Alphen	Netherlands	52° 8' N, 4° 39' E	Collected
C. Lidwien Raak-van den Berg	Wageningen University	2009	Engelbert	Netherlands	53° 12' N, 6° 38' E	Collected
C. Lidwien Raak-van den Berg	Wageningen University	2009	Tholen	Netherlands	51° 31' N , 4° 13' E	Collected
C. Lidwien Raak-van den Berg	Wageningen University	2009	Deelen	Netherlands	52° 3' N, 5° 53' E	Collected
Tamsin M. O. Majerus	University of Nottingham	1998	Fuchu	Japan	35°40'N, 139° 28' E	Collected
Tamsin M. O. Majerus	University of Nottingham	1998	Nagawa	Japan	36° 15' N, 138° 16' E	Collected
Christy Leppanen	University of Maine	2006	Orono, Maine	USA	44.8835°N, 68.6721°W	Collected
Ted E. Cottrell	United States Department of Agriculture	2010	Byron, Georgia	USA	32° 39' N, 83° 44' W	Collected
Oldřich Nedvěd	University of South Bohemia	2012*	University of South Bohemia	Czech Republic	48° 58' N, 14° 26' E	Collected
P. G. Tillman	United States Department of Agriculture	2006-2007	Irwin County, Georgia	USA	31° 34' N, 83° 17' W	Collected
Joseph W. Dixon	Iowa Grotto of the National Speleological Society	2011	Starrʼs Cave	USA	40° 51' N, 91° 8' W	Collected
N. A. Belyakova	All-Russian Institute of Plant Protection	2009- 2010	Irkutsk oblast	Russia	56° 11' N, 104° 00' E	Collected
N. A. Belyakova	All-Russian Institute of Plant Protection	2009 -2010	Primorskii kra	Russia	45° 04' N, 134° 54' E	Collected
George J. Stathas	Benaki Phytopathological Institute	1994	Benaki Phytopathological Institute	Greece	38° 04' N, 23° 48' E	Collected
Brecht Ingels	Ghent University	2008-2009	Ghent	Belgium	51° 03' N, 3°42' E	Collected
Annie-Ève Gagnon	Université Laval	2004-2005	Maskinongé	Canada	46°12′ N, 73°02′ W	Collected
Annie-Ève Gagnon	Université Laval	2004-2005	Hérouxville	Canada	46°39′ N, 72°37′ W	Collected
Annie-Ève Gagnon	Université Laval	2004-2005	Nicolet-Sud	Canada	46°12′ N, 72°36′ W	Collected
Annie-Ève Gagnon	Université Laval	2004-2005	Saint-Augustin-de-Desmaures	Canada	46°44′ N , 71°28′ W	Collected
B. K. Agarwala	Tripura University	2011	Tsuruoka	Japan	38°43′N, 139°49′E	Collected
Laura Jane Michie	University of Cambridge	2007-2008	Cambridge	United Kigndom	52° 12' N, 0° 07' E	Collected
A.-È. GAGNON	Université Laval	2011	Quebec City	Canada	46°46' N, 71°16' W	Collected
S. ELNAGDY	University of Cambridge	2011*	Fuchu	Japan	35°40'N, 139° 28' E	Collected
Mary M. Gardiner	Michigan State University	2007	Michigan	USA	44° 25' N, 85° 22' O	Collected
Susan E. Mose	University of Kentucky	2006	Lexington	USA	42° 24' N, 68° 98' E	Collected
Guang Wang	Shandong Agricultural University	2008-2009	Shandong Province	China	36°09′N, 117°09′E	Collected
Sophie Vandermoten	University of Liege	2009	Gembloux	Belgium	50°33'N, 4°41' E	Collected
Naoya Osawa	Kyoto University	1988	Botanical Garden, Kyoto University	Japan	35°02′ N, 135°47′ E	Collected
Vlatka Mičetić Stanković	University of Zagreb	2008-2010	Pazin	Croatia	45° 14' N, 13° 55' E	Collected
Vlatka Mičetić Stanković	University of Zagreb	2008-2010	Vela Traba	Croatia	45° 14' N, 13° 51' E	Collected
Vlatka Mičetić Stanković	University of Zagreb	2008-2010	Sovsko jezero	Croatia	45° 17' N, 18° 01' E	Collected
Vlatka Mičetić Stanković	University of Zagreb	2008-2010	Zmajevac	Croatia	45° 47' N, 18° 48' E	Collected
Vlatka Mičetić Stanković	University of Zagreb	2008-2010	Vukovar	Croatia	45° 20' N, 19° 00' E	Collected
Vlatka Mičetić Stanković	University of Zagreb	2008-2010	Maksimir Park Zg	Croatia	45°50′ N, 16° 01' E	Collected
Vlatka Mičetić Stanković	University of Zagreb	2008-2010	Papuk Mountain	Croatia	45° 31° N, 17° 36' E	Collected
Vlatka Mičetić Stanković	University of Zagreb	2008-2010	Bizek quarry	Croatia	45° 49' N, 15° 51' E	Collected
Vlatka Mičetić Stanković	University of Zagreb	2008-2010	Vugrovec	Croatia	45° 53' N, 16°06' E	Collected
Vlatka Mičetić Stanković	University of Zagreb	2008-2010	Plitvice lakes	Croatia	44° 21' N, 15° 25' E	Collected
Vlatka Mičetić Stanković	University of Zagreb	2008-2010	Sinj	Croatia	43° 41' N, 16° 38' E	Collected
Vlatka Mičetić Stanković	University of Zagreb	2008-2010	Voloder	Croatia	45° 33' N, 16° 40' E	Collected
Vlatka Mičetić Stanković	University of Zagreb	2008-2010	Ogulin	Croatia	45° 15' N, 15° 14' E	Collected
Vlatka Mičetić Stanković	University of Zagreb	2008-2010	Klimen	Croatia	46° 05' N, 16° 09' E	Collected
Vlatka Mičetić Stanković	University of Zagreb	2008-2010	Kaštel Žegarski	Croatia	44° 09' N, 15° 51' E	Collected
Vlatka Mičetić Stanković	University of Zagreb	2008-2010	Opatovac	Croatia	45° 19' N, 17° 26' E	Collected
Vlatka Mičetić Stanković	University of Zagreb	2008-2010	Zg Bot. Garden	Croatia	45° 47' N, 16° 03' E	Collected
Vlatka Mičetić Stanković	University of Zagreb	2008-2010	NP Lonjsko polje	Croatia	45° 24' N, 16°37' E	Collected
Jose Iannacone	University of Ricaro Palma	2011	El Agustino	Peru	12°2'29"S, 76°58'27" W	Collected
Jose Iannacone	University of Ricaro Palma	2011	La Molina	Peru	12°4'24"S, 76°56'10"W	Collected
Jose Iannacone	University of Ricaro Palma	2011	Los Olivos	Peru	11°58'38"S, 77°4'26"W	Collected
Jose Iannacone	University of Ricaro Palma	2011	Miraflores	Peru	12°07'03"S, 77°02'35" W	Collected
Jose Iannacone	University of Ricaro Palma	2011	Rimac	Peru	11°56' S, 76°06' W	Collected
Jose Iannacone	University of Ricaro Palma	2011	San Martin de Porres	Peru	12°1'27"S, 77°4'10" W	Collected
Jose Iannacone	University of Ricaro Palma	2011	San Borja	Peru	12°04’58"S, 76°57’47" W	Collected
Jose Iannacone	University of Ricaro Palma	2011	San Juan de Lurigancho	Peru	11°58'36"S, 76°59'27"W	Collected
Jose Iannacone	University of Ricaro Palma	2011	Lurigancho- Chosica	Peru	12°02'S, 77°01' W	Collected
Jose Iannacone	University of Ricaro Palma	2011	Cieneguilla	Peru	12°4'42"S, 76°46'17"W	Collected
Jose Iannacone	University of Ricaro Palma	2011	Lurin	Peru	12°16'30"S, 76°52'0"W	Collected
Jose Iannacone	University of Ricaro Palma	2011	Cercado de Lima	Peru	12°3'20"S, 77°2'48"W	Collected
Jose Iannacone	University of Ricaro Palma	2011	Villa El Salvador	Peru	12°12'34"S, 76°56'06"W	Collected
Jose Iannacone	University of Ricaro Palma	2011	San Vicente de Cañete	Peru	13°4'42"S, 76°22'58"W	Collected
Jose Iannacone	University of Ricaro Palma	2011	Huaral	Peru	11°29'50"S, 77°12'24"W	Collected
Jose Iannacone	University of Ricaro Palma	2011	Chancay	Peru	11°34'50"S, 77°15'47"W	Collected
Jose Iannacone	University of Ricaro Palma	2011	Callahuanca	Peru	11°52'27"S, 76°32'48"W	Collected
Jose Iannacone	University of Ricaro Palma	2011	Callao	Peru	12°03'23"S, 77° 08'40"W	Collected
Jose Iannacone	University of Ricaro Palma	2011	Ventanilla	Peru	11°52'41"S, 77°8'15"W	Collected
Jose Iannacone	University of Ricaro Palma	2011	Tambopata	Peru	12°36'0"S, 69°10'60"W	Collected
Sergey Ya. Reznik	Russian Academy of Sciences	2004	Khasanskiy region	Russia	43°05′N, 131°30′E	Collected
L. Nicole Davidson	Utah State University	2008	Cache County	USA	41.395912° N, 111.5307° W	Collected
Susanne Harding	University of Copenhagen	2009	Copenhagen	Denmark	55° 40' N, 12° 34' E	Collected
Matthew H. Greenstone	United States Department of Agriculture	2011*	Lexington	USA	42° 24' N, 68° 98' E	Collected
Matthew H. Greenstone	United States Department of Agriculture	2011*	Silver Lake	USA	34° 5' N, 118° 16' W	Collected
Suzuki Noriyuki	Kyoto University	2009	Iwakura	Japan	35°09′N, 135°79′E	Collected
Katherine J. Forbes	University of Wisconsin	2003- 2004	Wisconsin	USA	43°18′N, 89°21′W	Collected
Michael P. Seagraves	United States Department of Agriculture	2009	Kentucky	USA	37.5° N, 85°W	Collected
Michael P. Seagraves	United States Department of Agriculture	2009	Maryland	USA	39° N, 76.7° W	Collected
Michael P. Seagraves	United States Department of Agriculture	2009	South Dakota	USA	44.5° N, 100° W	Collected
Santolo Francati	University of Bologna	2013-2014	Bologna	Italy	44°48'39"N,11°37'84"E	Collected
J. Turgeon	Université Laval	2007	Quebec City	Canada	46°46' N, 71°16' W	Collected
J. Turgeon	Université Laval	2009	Brookings	USA	44°18' N, 96° 47' W	Collected
Tetsuya Adachi-Hagimori	Research Institute of Environment	2008	Osaka	Japan	34.5°N,135.6°E	Collected
Benoit Facon	Centre de Biologie pour la Gestion des Populations	2007- 2008	Kyoto	Japan	35.01°N,135.77°E	Collected
Benoit Facon	Centre de Biologie pour la Gestion des Populations	2007- 2008	Novosibirsk	Russia	55.04°N, 82.93°E	Collected
Benoit Facon	Centre de Biologie pour la Gestion des Populations	2007- 2008	Abakan	Russia	53.73°N, 91.46°E	Collected
Benoit Facon	Centre de Biologie pour la Gestion des Populations	2007- 2008	Croix	France	50.68°N, 3.14° E	Collected
Benoit Facon	Centre de Biologie pour la Gestion des Populations	2007- 2008	Brookings	USA	44.35°N, 96.81°W	Collected
Benoit Facon	Centre de Biologie pour la Gestion des Populations	2007- 2008	Bethlehem	South Africa	28.25°N, 28.32°E	Collected
Tsunashi Kamo	National Institute for Agro-Environmental Sciences	2009	Tsukuba	Japan	36°1′30″N, 140°6′57″E	Collected
Matthew Meisner	University of Wisconsin	2011*	Arlington Agricultural Research Station	USA	43°18′N, 89°20′W	Collected
Dae Hong Lee	Chungnam National University	2006-2007	Daejeon	South Korea	36°21'N, 127° 23' E	Collected
Matthew H. Meisner	United States Department of Agriculture	2011*	Wisconsin	USA	43°18′N, 89°21′W	Collected
Bruno Frechette	University of Montreal	2011*	southwestern Quebec	Canada	45° 21' N, 73° 09' W	Collected
Élise Bél a nger	University of Montreal	2009-2010	Saint-Bernard Island	Canada	45° 23′ N, 73° 45′ W	Seen
Ilya A. Z ak h a rov	Vavilov Institute of General Genetics	2004	Denver	USA	39° 44' N, 104° 59' W	Collected
Ilya A. Z ak h a rov	Vavilov Institute of General Genetics	2009	Cambridge	United Kigndom	52° 12' N, 0° 07' E	Collected
Ilya A. Z ak h a rov	Vavilov Institute of General Genetics	2008	Berlin	Germany	52° 31' N, 13° 23' E	Collected
Ilya A. Z ak h a rov	Vavilov Institute of General Genetics	2006	Turin	Italy	45° 04' N, 7° 41' E	Collected
Ilya A. Z ak h a rov	Vavilov Institute of General Genetics	2010	Kyoto	Japan	35.01°N,135.77°E	Collected
Oldřich Nedvěd	University of South Bohemia	2010-2011	Kikambala	Kenya	3° 48.28’S; 39° 50.00’E	Seen
Dingwu Zhang	China Agricultural University	2004-2009	Pinggu	China	40° N, 117° E	Collected
Dabin Yao	Life Science Institute of Northeast Forestry University	2007	Harbin	China	45° 43' N, 126° 38' E	Collected
Benoît Facon	University of Antwerp	2007-2008	Croix	France	50°40′ N, 3°08′ E	Collected
Robert Lee Koch	Minnesota Department of Agriculture	2010	Dourados	Brazil	22°11’ S, 54°55’ W	Collected
Robert Lee Koch	Minnesota Department of Agriculture	2011	Dourados	Brazil	22°12’ S, 54°48’W	Collected
John J. Couture	University of Wisconsin	2008	Madison	USA	43° 18' N, 89°20' W	Collected
Audrey Grez	University of Chile	2008-2009	Various locations	Chile	33°26' S 70°39' W	Collected
Kent Fothergill	Conservation Seeding and Restoration	2008-2009	Missouri	USA	38°30′N 92°30′ W	Collected
Changmann Yoon	Chungbuk National University	2010*	Chungbuk National University	South Korea	36°37' N, 127°27' E	Collected
Folukemi Adedipe	West Virginia University	2010*	Morgantown	USA	39°38' N, 79°57′ W	Collected
Tsunashi Kamo	National Institute for Agro-Environmental Sciences	2008-2009	Tsukuba	Japan	36°1′30″N, 140°6′57″E	Collected
Jürgen Gross	Institute for Plant Protection in Fruit crops and Viticulture	2008	Dossenheim	Germany	47° 51' N, 12° 07'E	Collected
John J. Sloggett	Tussen Beide Markten 45, 9712 CC Groningen, The Netherlands	2010*	Groningen	Netherlands	53°13′ N, 6°34′ E	Collected
Satoshi Nakayama	Okayama University	2004	Fukuyama	Japan	34° 28' N, 133° 23' E	Collected
Andris Bukejs	Institute of Systematic Biology, Daugavpils University	2015*	Capadoccia	Turkey		seen
Tolga Aysal	Namık Kemal University, Faculty of Agriculture	2014*	Tekirdağ	Turkey		seen
Yohan Solano	Universidad Centroccidental Lisandro Alvarado, Decanato de Agronomía	2014*	Aragua	Venezuela		seen
Yohan Solano	Universidad Centroccidental Lisandro Alvarado, Decanato de Agronomía	2014*	Lara	Venezuela		seen
