# Supplementary material for: From effective biocontrol agent to successful invader: the harlequin ladybird (Harmonia axyridis) as an example of good ideas that could go wrong
Source: PeerJ. 2017 May 16;5:e3296. doi: 10.7717/peerj.3296 (PMC5436555; doi:10.7717/peerj.3296)
Supplement: Supplemental Information 3 [file peerj-05-3296-s003.xlsx]

## Sheet: Sheet1
		location where they can be found				locations where they are absent			type of habitat where they are found					negative effects
researcher	country	location 1	location 2	location 3	location 4	location absent 1	location absent 2	localized/trhough	habitat 1	habitat 2	habitat 3	vector	date.introduction	reduction of native ladybird species	relevant information
1	Australia					Australia									have been interecepted it in the airport several times
2	Australia	United Kingdom				Australia
3	Austria	Upper Austria	Mountains in South Austria	Danube valley	Northern part to the border of Czech Republic			trhough					2007
4	Belgium	Brussels, Belgium
5	Brazil					Farol, Paraná, South Brazil									concerned for ladybirds to become a problem
6	Brazil	Southeast Brazil						trhough						1
7	Brazil	Minas Gerais, Brazil						through	corn fields				2002		biocontrol compannies are rearing them to sell as biocontrol agents
8	Brazil	South Brazil	Southeastern Brazil			Northeastern Brazil	North Brazil	through	crop fields	urban areas	rural areas	dispersion			first record in Paraná State, Argentina
9	Brazil	Central Brazil	South Brazil					through	vegetable and fruit fields	edge areas		biocontrol	2008		not observed in preserved areas
10	Brazil	Paraná						through					2007	1	not yet record of spp going extinct
11	Brazil	Rio Grandre do Sul, Santa Catarina and Paraná	Sao Paulo, Rio de Janeiro, Minas Gerais	Distrito Federal, Mato Grosso do Sul				through				expansion from Argentina	2002		competing with some native aphidophagous species
12	Chile	Santiago, Chile						trhough	domestic gardens					1
13	Chile	South Chile	all Chile					through	crop fields	urban areas		biocontrol		1	peple in cities are alarmed by the invasion
14	Chile	Chile
15	Chile	Santiago, Chile	Punta Arenas, Chile	Valle del Cauca y Cali, Colombia	Ecuador, Uruguay, Paraguay, Quibor Venezuela	Arica, Chile	Copiapó, Chile	through	urban areas	crofields	reserves				El origen de la introducción en Chile probablemente fue desde ARGENTINA, vía paso Los Libertadores, donde entran cientos de vehículos diariamente.	Las reacciones son negativas y positivas, a mucha gente le gustan y preguntan como protegerlas o cuidarlas, otros no las quieren pero tampoco quieren destruirlas, algunos pocos preguntan como matarlas.	Ecosistemas: Aun no he visto un efecto claro, ya que frecuentemente las veo en compañía de especies nativas (Adalia, Cycloneda, Eriopis) u otras introducidas (Adalia bipunctata, Hippodamia). Lo que si es claro es que hay predominancia de Harmonia.		La disminución de algunas especies de chinitas en ambientes urbanos se viene observando en Chile desde mucho antes de la introducción de Harmonia, y probablemente se deba al uso de insecticidas y al alejamiento de las áreas silvestres colindantes a medida que la ciudad crece. También en mi barrio quedan pocos sitios eriazos donde era posible encontrarlas en abundancia. A pesar de ello sigo viendo…
16	China	All China						trhough				native			native and benefitial to control agricultural pests
17	China	Beijiang				Xinjiang, China						native
18	China	Northeastern Mounainous region, China										native		1	residents hates them severely, used as biocontrol
19	China	Fujian Provincd, China	Heilongjiang	Jilin	Hebe			through				native			is considered an effective biocontrol agent
20	China	Beijing	Henan	Shandong	Shannxi			through				native			scientists are eager to devolpe effective ways of mass rearing as biocontrol
21	China	Gansu	Sichuan	Jiangsu	Jiangxi, Zhejiang, Hunan, Fujian, Guangdong, Guangxi, and Yunnan			through				native			is considered an effective biocontrol agent
22	China	Shandong Province, China						through	corn cropfield			native			it is a summer species
23	China	Hainan Island	Taiwan Island	All China				through	urban areas	cropfields	reserves	native			This species have phototaxis. You can consider using trapping light with special wavelength to trap and kill them, if they are threat to native species.
24	Cuba					Cuba
25	Czech Republic	Czech Republic				Mountain ranges		through							competition for food with native spp
26	Czech Republic	Czech Republic						through	urban areas	natural reserves	cropfields		2006	1	Intentional introduction in 2000ies failed. From 2006 spreading naturally and by the means of human transportation from Germany.	Adalia bipunctata declined.	Some coccinellids declined, Harlequin substitutes their ecosystem services	nuisance pest for people during autumn migration to buildings
27	Denmark	Denmark						through						1
28	England	Eastern, England						through
29	England	England						through	parks and gardens	cropfields	urban/suburban	accidental		1	They have been inadvertently introduced to the UK via imports including flowers and fruit	Adalia bipunctata is particularly threatened
30	France	all over France						through				bicontrol, range expansion
31	France	Saint Laurent du Lévézou	Esperce			Mountanious regions		through				biocontrol	1990s	1	invasive ladybird was sheltered inside the overwintering aggregations of native ladybird species
32	Germany	Germany
33	Greece	Northern Greece	Lemnos Island	Thessaloniki	Larissa and Igoumenitsa			through				biocontrol			mass releases were done in the early 90s
34	India					Bangalore
35	India														unconfirmed reports of the harlequin precence in northwestern and eastern Himalayan region of India
36	Iran					South Iran
37	Ireland	Cork	Co. Carlow	South and EastIreland	Dublin, Co. Down, Co. Antrim			localized	urban gardens			accidental, veggies at suppermarket	2007		ladybir transported from Ely, Cambridgeshire with celery hearts to a Tesco store in Lisburn, Co. Antrim; The range restriction in Ireland (to south-eastern counties) is interesting. This suggests a climatic limit to its eventual range i.e. restriction to areas with a more continental climate. The first record of breeding in Ireland was for a south-eastern locality – Bunclody, Co. Carlow. I was se…
38	Italy	Italy						throughout						1	preference in cold and temperated zones of Northern Regions respect to Mediterranean	I saw a decrease of some common native species of Coccinellidae (e.g. Adalia bipunctata, hippodamia variegata, etc)
39	Japan	Japan						through	cropfield			native			is considered a beneficial natural enemy
40	Japan	Japan						throughout				native			Certainly, H. axyridis is the superior species as compared with other ladybirds.But the inferior species tend to avoid remaining on trees and crops with H. Axyridis and may settle for other resource without H. ladybirds.(e.g. Noriyuki, 2015)
41	Japan	Japan				Okinawa						native
42	Japan	islands of Hokkaido, Honshu, Shikoku, Kyushu, Tsushima, Iki, and Gotoh						through				native
43	Netherlands	Nehterlands						through	urban areas				2004	1	now attacked by native natural enemies in Netherlands
44	New Zeland					New Zeland
45	Norway	Oslo, Norway										accidental			It is believed that it has been accidentally introduced through import of plants
46	Pakistan	Penjab, Pakistan						localized
47	Portugal					Portugal
48	Portugal					Azores Archipielago, Portugal
49	Russia	Sochi, Russia	Krasnodar, Russia					localized
50	South Africa	Durban, South Africa											2013
51	South Africa							through	crop fields	urban areas					they overwinter inside buildings and are common in urban areas
52	South Africa	Stellenbosch, South Africa						through	arboreal habitats						they are feeding on the aphids present abundantly on senescent oak leaves and walking on the tennis courts near the trees
53	Spain	La Laguna, Tenerife	Bilbao	Gerona				localized				biocontrol			uso exitoso como biocontrol en invernaderos de Almería
54	Sweden	Uppsala, Sweden	Skane, Sweeden	Gotland, Sweden											there is free movement of people and goods from north/central Europe to southern Sweden via Denmark, and they could have been carried on wind currents	Models predict that the entire southern half of Sweden will be potentially suitable habitat for this species given current climate warming trends
55	Switzerland	Zurich, Switzerland	Basel, Switzerland					throughout							As an outcome of an initial risk assessment H. axyridis was never allowed to be released in Switzerland. (there were minor releases that did not result in establishment, though). It was introduced into neighboring European countries e.g. France and Germany. First individuals were found in Basel (Northwest Switzerland).	H. axyridis is now the dominant ladybird in Switzerland.
56	Switzerland	Switzerland						throughout	urban areas	cropfieldsorchards	forests, edge of forests, meadows, pastures	accidental spread	2006	1	introduced in Europe (Belgium I think) in Greenhouse to fight the aphids
57	Switzerland											accidental spread		1	It entered by itself from the North, Germany and France. But it was first found reproducing in Europe in Belgium and Germany and spread from there	show that one species is declining seriously, but not yet going extinct, i.e. Adalia bipunctata
58	Turkey					ANKARA, TURKİYE
59	Turkey	Cappadocia, Turkey						localized
60	England	England						through						1
61	England							throughout				accidental spread			Secondary spread – never intentionally introduced within the UK.
62	Uruguay	Pando, Canelones (-34.720720, -55.947597)						localized
63	USA	High Plains of USA						through	parks	urban environments	soybean crop fields	biocontrol	early 1990s	1	indigenous populations in China, Korea and Japan are very different in biology and behaviour from the invasive populations in N.A. And Europe	H. axyridis is present on the High Plains of USA, but it is not a dominant coccinellid species in this region. The habitat is not ideal, as H. axyridis lacks the drought-tolerance of local populaations of Hippodamia convergens and has poor winter survival – winters can be harsh on the plains, with cold weather and sharp temperature fluctuations – there is little snow cover and H. axyridis does no…	H. axyridis has a long history in the USA. Introductions were attempted as early as 1915 (California) and as late as 1985 (North Carolina), but none appeared to result in establishment. Genetic evidence now suggests that all North American H. axyridis can be traced back to an unintentional introduction on the Gulf Coast int he early 1990's.	I did some early work on this when I was in central Florida, and yes, H. axyridis is a voracious intraguild predator and highly successful within its niche, often at the expense of the abundance of native species that share its niche. There is now a LOT of work on this from Europe and South America, all converging on the competitive dominance of this species against less aggressive native species.	I would say that H. axyridis has been responsible for the competitive displacement of some native species from particular agricultural and horticultural habitats and lowered the relative abundance of many native species in these habitats, but I am not aware of any species that have gone extinct. In fact, many affected species may have retreated to natural habitats where they persist, albeit at lo…
64	USA	Lafayette, Indiana, USA						through	agricultural areas	small urbanization areas	forest habitats	biocontrol			introduced to control soybean aphid
65	USA	Doña Ana County, New Mexico	Bernalillo, New México			Hawaii									There is a single record in Hawaiian literature (Timberlake, 1943) of it be introduced into Hawaii from Japan in 1895. That reference is:
66	USA	South Dakota						through				spread from biocontrol		1	Likely they were released in the Eastern and Southern areas of the United States, and moved in to South Dakota	Harmonia axyridis has become a dominant predator in multiple cropping systems and in natural areas (especially in trees in the latter habitats)
67	USA	Florida						through							The species is commonly associated in citrus and orange jasmine with the Asian citrus psyllid
68	USA	Wisconsin, USA						through				spread from biocontrol			became increasingly common with the arrival of soybean aphids in the late 1990s.	We find Harmonia coexisting with many other lady beetle species (native and introduced).	I view them as extremely beneficial. They are voracious predators that do a very good job controlling aphids in the soybean, alfalfa, and corn fields that we study.
69	USA	Southern California						localized							not aware of negative impacts in Southern California
70	USA	Michigan	Ontario, Canada	Great lakes region				through	urban	cropfields	arboreal habitats		1993	1	In summer, Harmonia most commonly occurs in crop fields and arboreal habitats throughout central North America/the Great lakes region, In spring and fall, we commonly see aggregations on the shores of the great lakes, and in buildings in fall only	got to Michigan and Ontario through the mechanism of gradual northern expansion of their range	there’s a multitude of papers in the literature debating the role of Harmonia in interactions with native lady beetle. In my opinion, intraguild predation as a driving force is vastly overstated, and any such declines of native species are driven by competitive advantages in foraging behavior
71	USA	USA						throughout	cropfields	horticultural landscapes	natural landscapes
72	USA	USA						throughout							http://www.discoverlife.org/mp/20m?act=mapper&kind=Harmonia+axyridis&centroid=US&r=.125&w=900&a=I_LB&m_symbol_size=5
73	USA	Oregon, USA	Washington, USA					throughout							THIS ORGANISM APPEARS TO HAVE A POSITIVE ROLE IN REGULATING HOP APHID ON HOP
74	USA	Fayetteville, Arkansas	Starkville, Mississippi	Leland, Mississippi				throughout
75	USA	Boulder County, Colorado
76	USA	Tennesse	North Carolina					through					1980	1	introduced into Georgia in the 1980’s in an attempt to control pecan aphids.	At least one of our native coccinelids (Coccinella novemnotata) has not been seen since the 1950’s, and it is suspected that it is due to competition from H. axyridis.	They frequently overwinter in houses and other buildings in large numbers.
77	Venezuela	Quibor, estado Lara, Venezuela	La Colonia Tovar, estado Aragua, Venezuela					localized	cropfield areas				2013	1	Yes, I do. We have seen few amount of Cycloneda sanguinea, Hippodamia convergens and Colleomegilla maculata, since H. axyridis and C. sexmaculata started appearing in Venezuela. It's possible there's a negative effects for competition.
78	Germany	Kiel, Germany						through							Within last 3 years the proportion to C. 7punctata is drastically increased.	In the fridge (+11) this year they overwintered much worser than C.septempunctata due to some parasici invasion.
79	Philippines					Philippines
80	USA	North-Central Florida (Gainesville, San Felasco, Hammock Preserve State Park, Apalachicola National Forest, Ocala National Forest)						through	towns	fields	forest areas	biocontrol		1	they were introduced in the 1990’s to “help” control aphid populations, because the native ones “weren’t” doing enough	Significant competition for our native ladybugs, causing extirpation and may possibly cause extinction. Also not a natural predator for the aphids/scales and may be causing harm to those populations as well	No, proving extinction in insects is extremely difficult. While it is likely several species will go extinct in the near future, at least in part due to this species, it will be in conjunction with other factors, e.g. other invasive competition and habitat destruction.	It is well documented that this species will congregate during cold weather, usually finding a corner indoors, to the dismay of many homeowners. They will find nooks and crannies to hide in almost anywhere. In Indiana there is an issue with wine production and these beetles as they hide in the bunches before they’re picked and give the wine an odd/bad flavour once crushed
81	USA	South Dakota						through				geographic range expantion			I am aware and have observed intraguild predation in the field. However, I am not aware of direct evidence that harlequin lady beetle has directly impacted other species. They are considered a nuisance pest in homes and buildings because of Fall aggregations at overwintering sites.	most observable in late summer and Fall
82	Mexico	Morelia	Guadalajara					through	cropfields	cieties	parks and gardens
